# Supplementary material for: Kinetic separation of C2H6/C2H4 in a cage-interconnected metal–organic framework: an interaction-screening mechanism
Source: Royal Society of Chemistry journal article supplement (doi:10.1039/d2qi00465h), 2022-01-01
Supplement: d2qi00465h1.pdf [file d2qi00465h1.pdf]

Electronic Supplementary Information

# **Kinetic Separation of C<sub>2</sub>H<sub>6</sub>/C<sub>2</sub>H<sub>4</sub> in A Cage-Interconnected Metal-Organic Framework: An Interaction-Screening Mechanism**

Mo Xie, Zhou Lu,† Weigang Lu,\* Dan Li\*

*College of Chemistry and Materials Science, Guangdong Provincial Key Laboratory of Functional Supramolecular Coordination Materials and Applications, Jinan University, Guangzhou, Guangdong 510632, People's Republic of China.*

*E-mail: weiganglu@jnu.edu.cn; danli@jnu.edu.cn*

*†Present address: Department of Chemistry, University of North Texas, Denton, Texas 76203, USA.*

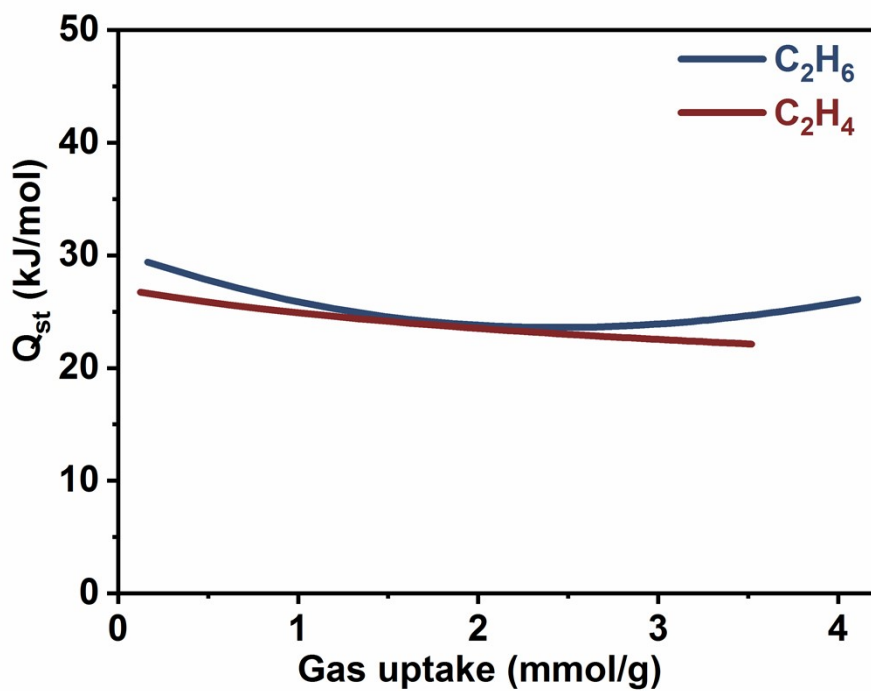

**Figure S1.** Adsorption enthalpy ( $Q_{st}$ ) of  $C_2H_6$  and  $C_2H_4$  on JNU-2 calculated from their experimental adsorption data.

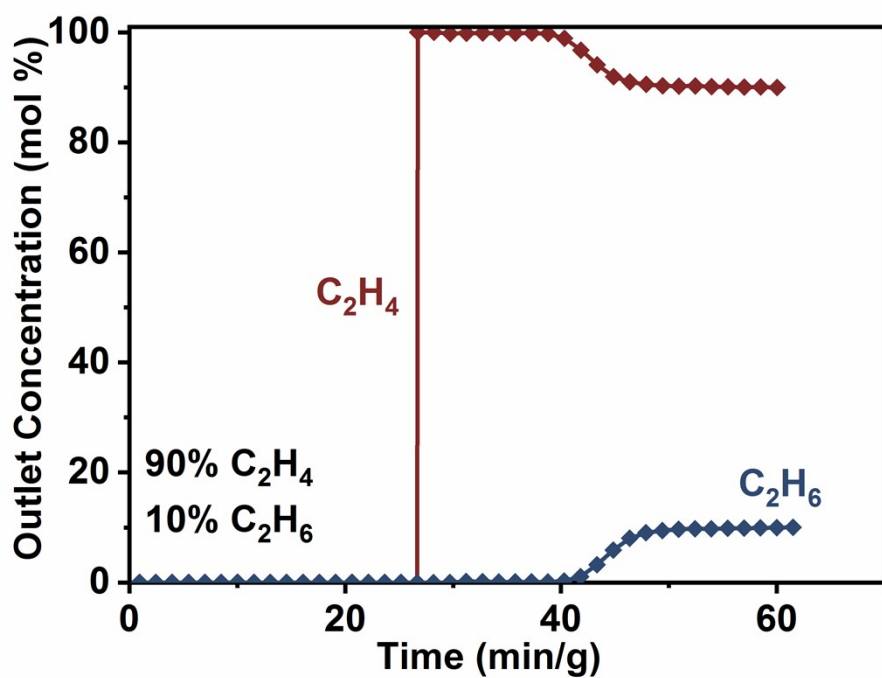

**Figure S2.** Breakthrough curves for  $C_2H_6/C_2H_4$  (10/90) mixture on JNU-2.

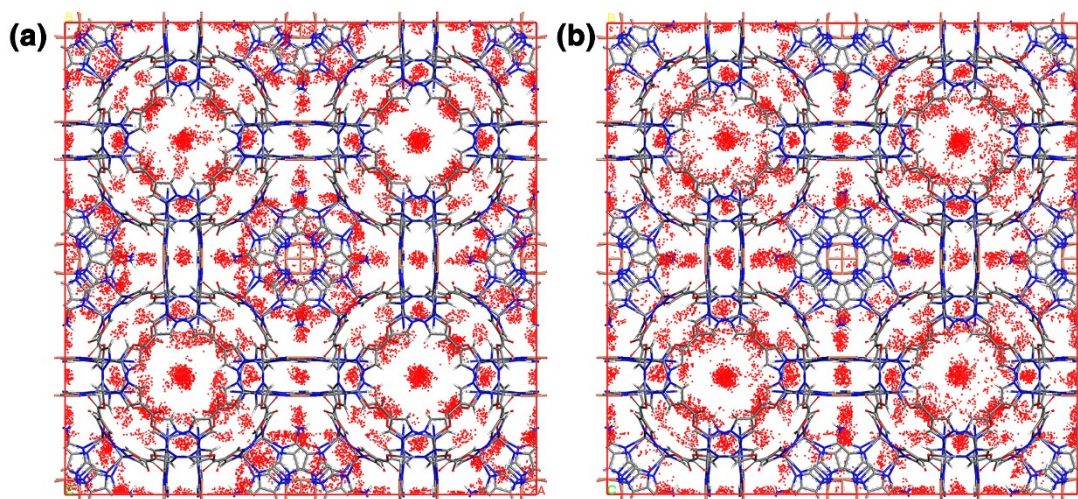

Figure S3. Molecular distribution of  $C_2H_6$  (a) and  $C_2H_4$  (b) in JNU-2 at 1 bar.

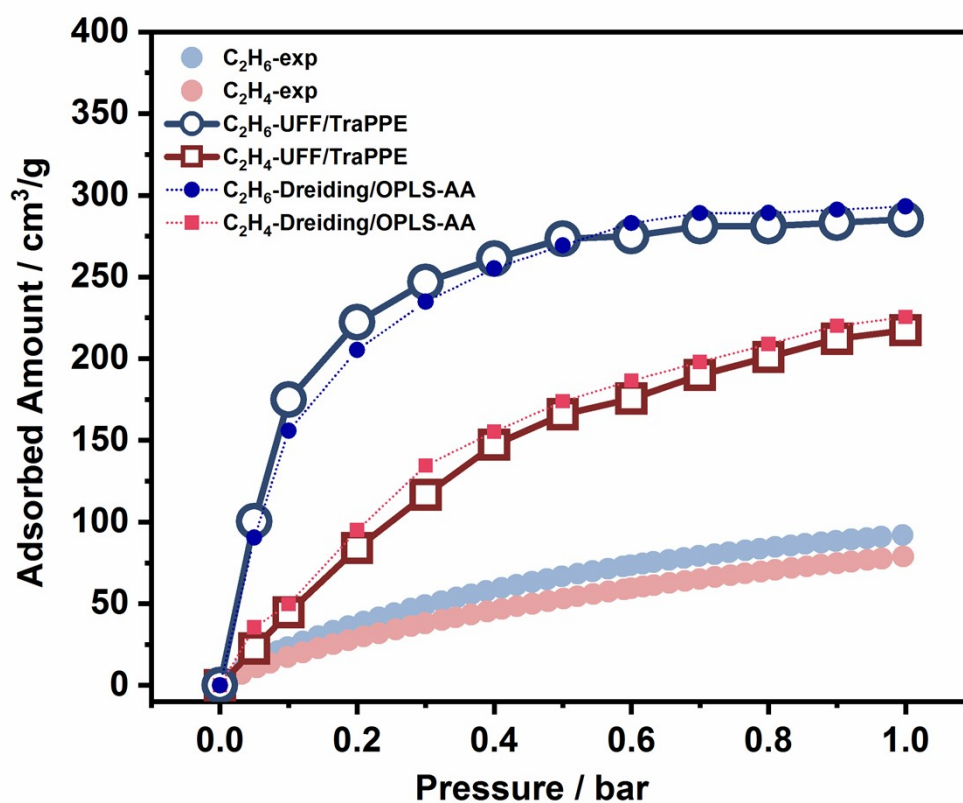

Figure S4. Comparison of the simulated adsorption amount employing different force field parameters.

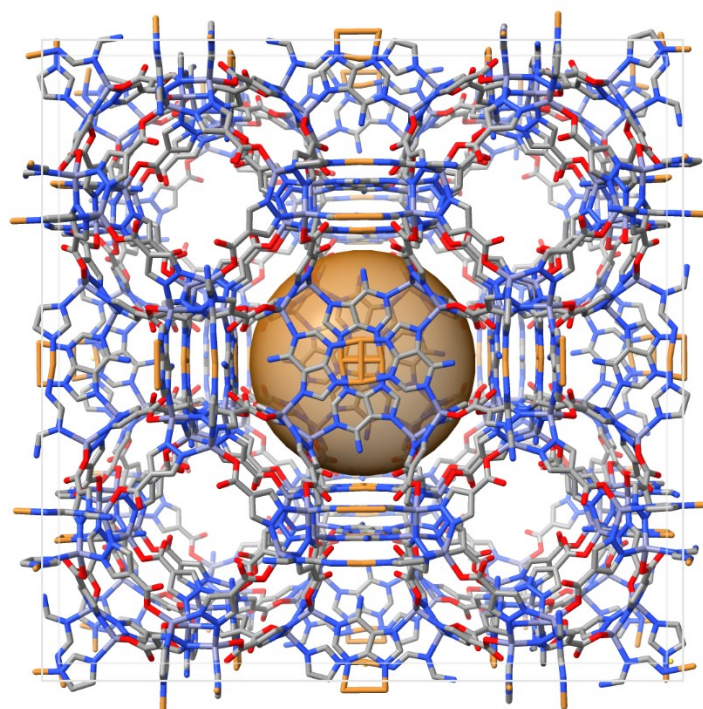

**Figure S5.** JNU-2 model used in GCMC simulation in the RASPA program, the brown ball represents the blocking sphere.

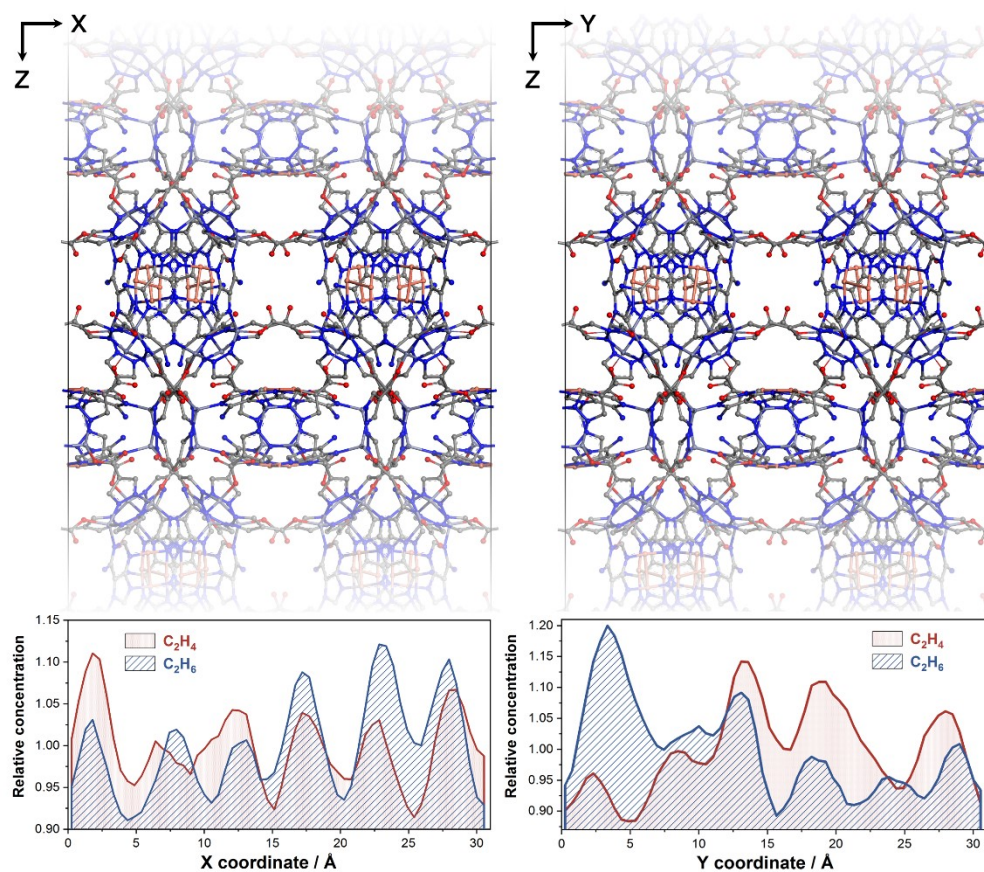

**Figure S6.** View of **channel I** model in x and y direction, and the statistical gas concentration along X coordination and Y coordination, respectively.



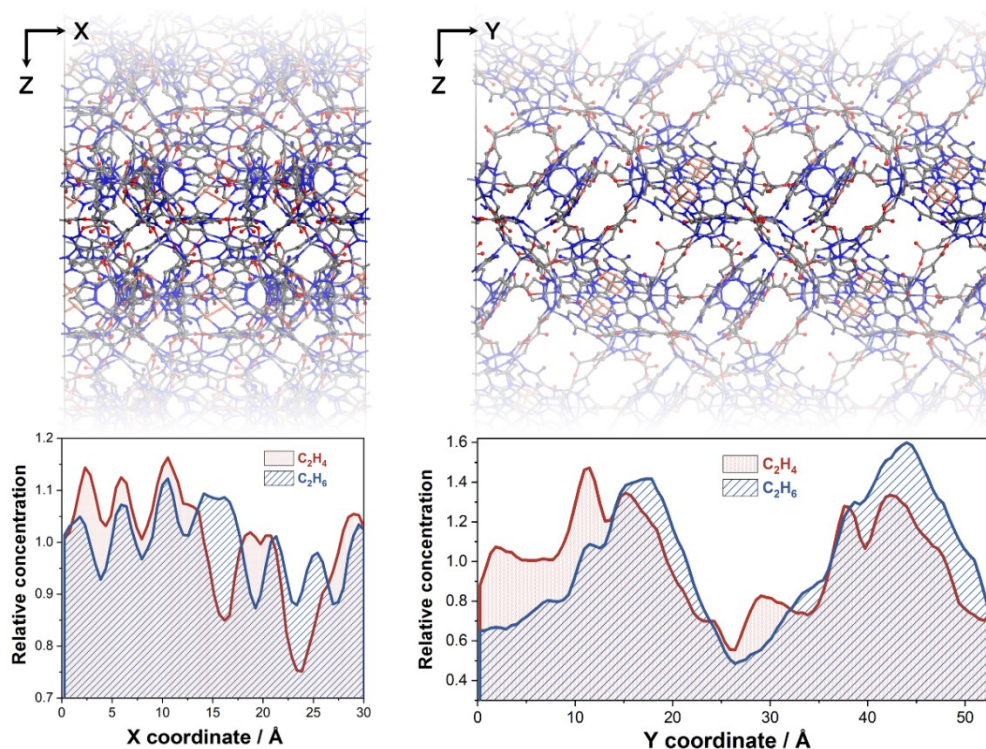

**Figure S7.** View of **channel II** model in x and y direction, and the statistical gas concentration along X coordination and Y coordination, respectively.

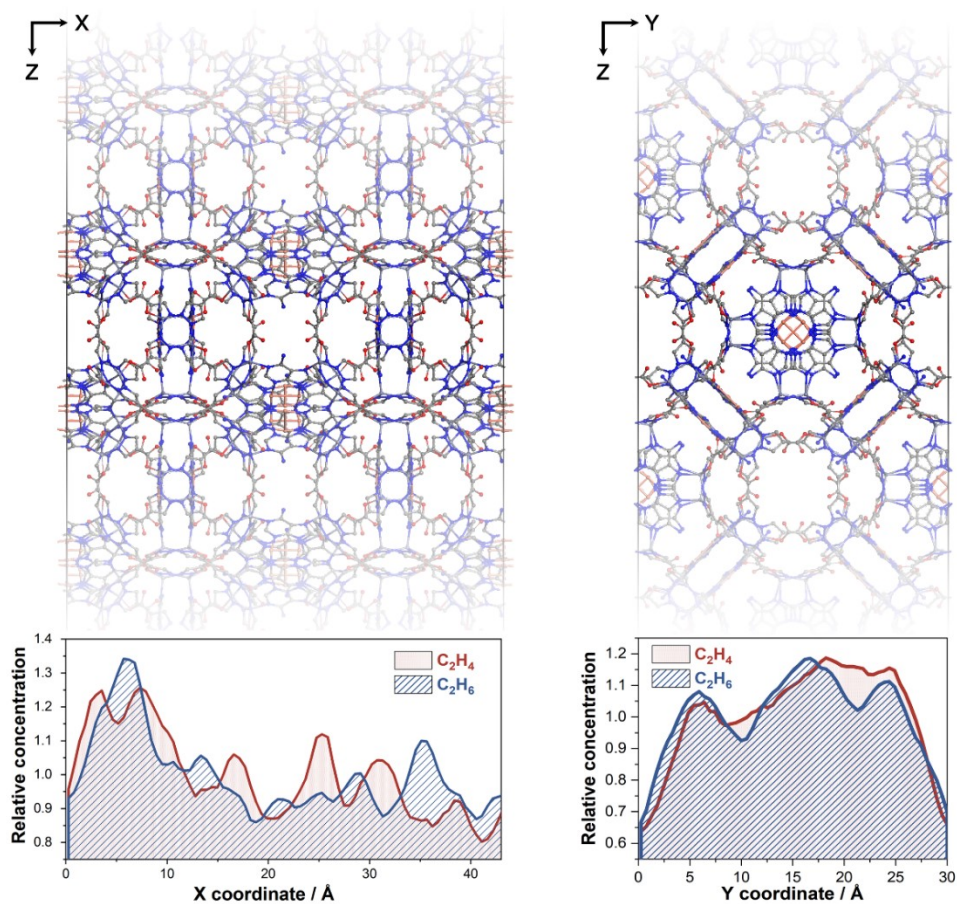

**Figure S8.** View of **channel III** model in x and y direction, and the statistical gas concentration along X coordination and Y coordination, respectively.

**Table S1.** The energy decomposition analysis (EDA) of the interaction energy between  $5C_2H_4/5C_2H_6$  and **Cage B**.

|             | $5C_2H_4$ / kcal/mol | $5C_2H_6$ / kcal/mol |
|-------------|----------------------|----------------------|
| $E_{ele}$   | -37.90               | -33.64               |
| $E_{rep}$   | 74.63                | 67.00                |
| $E_{orb}$   | -13.98               | -14.75               |
| $E_{disp}$  | -54.85               | -49.57               |
| $E_{total}$ | -32.11               | -30.97               |

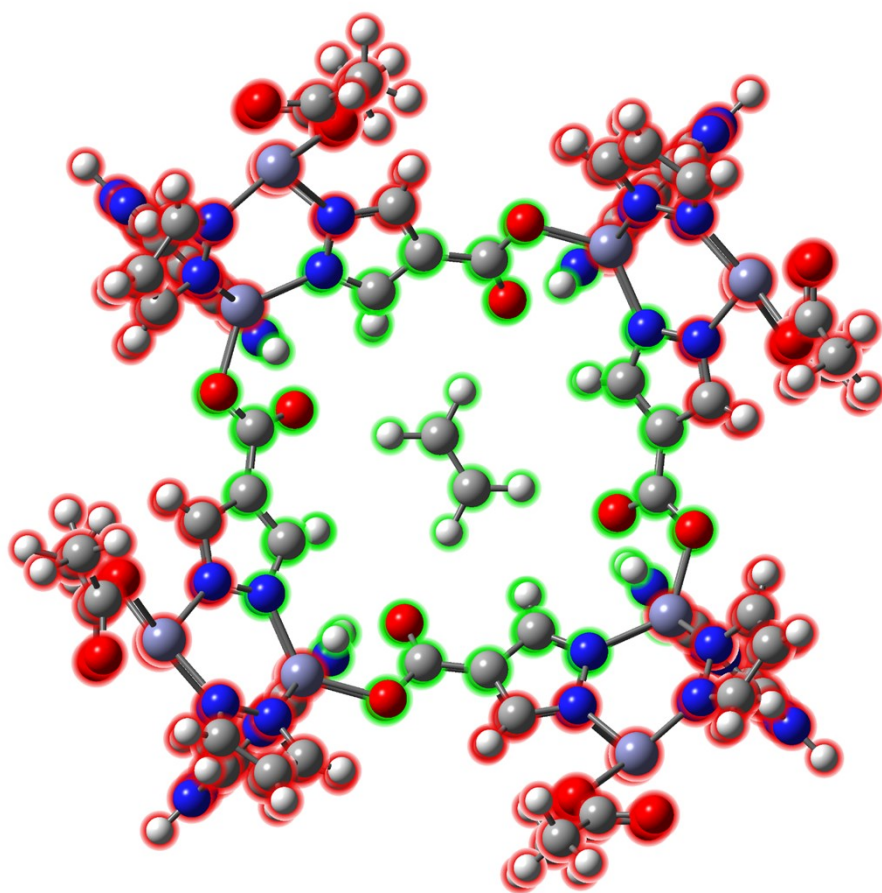

**Figure S9.** Schematic diagram of gas@Cage A model (take  $C_2H_4$ @Cage A as an example) used in DFT calculations, fixed atoms are labelled in red, and unfixed atoms are labelled in green.



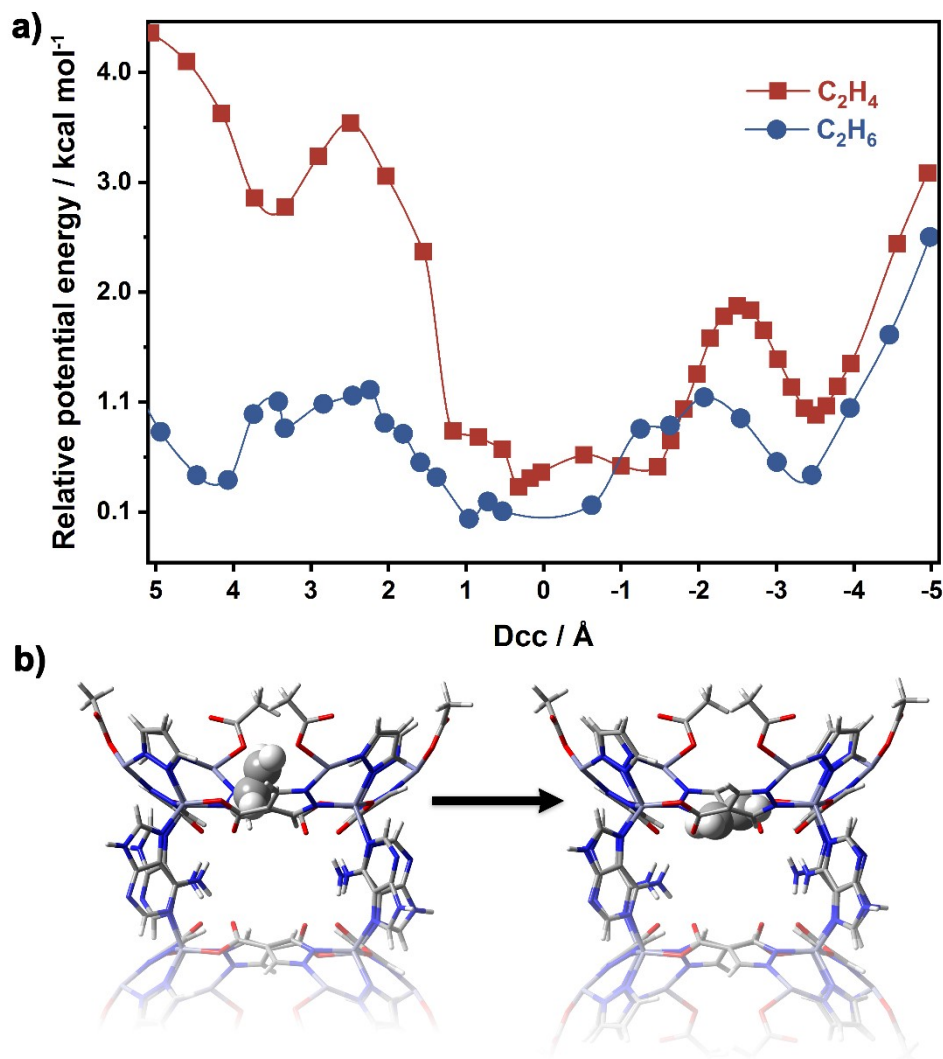

**Figure S10.** a) The relative potential energy curve of gas molecules moving along the axis of Dcc. Dcc is displayed as negative when gas molecules are moving away from the center of **Cage A**. C<sub>2</sub>H<sub>4</sub> is in a vertical configuration when approaching **Window 1**, and changes into a parallel configuration in the middle of **Window 1**. This could be the reason for the higher potential energy of C<sub>2</sub>H<sub>4</sub> in the Dcc range of 5.0~1.0 Å.

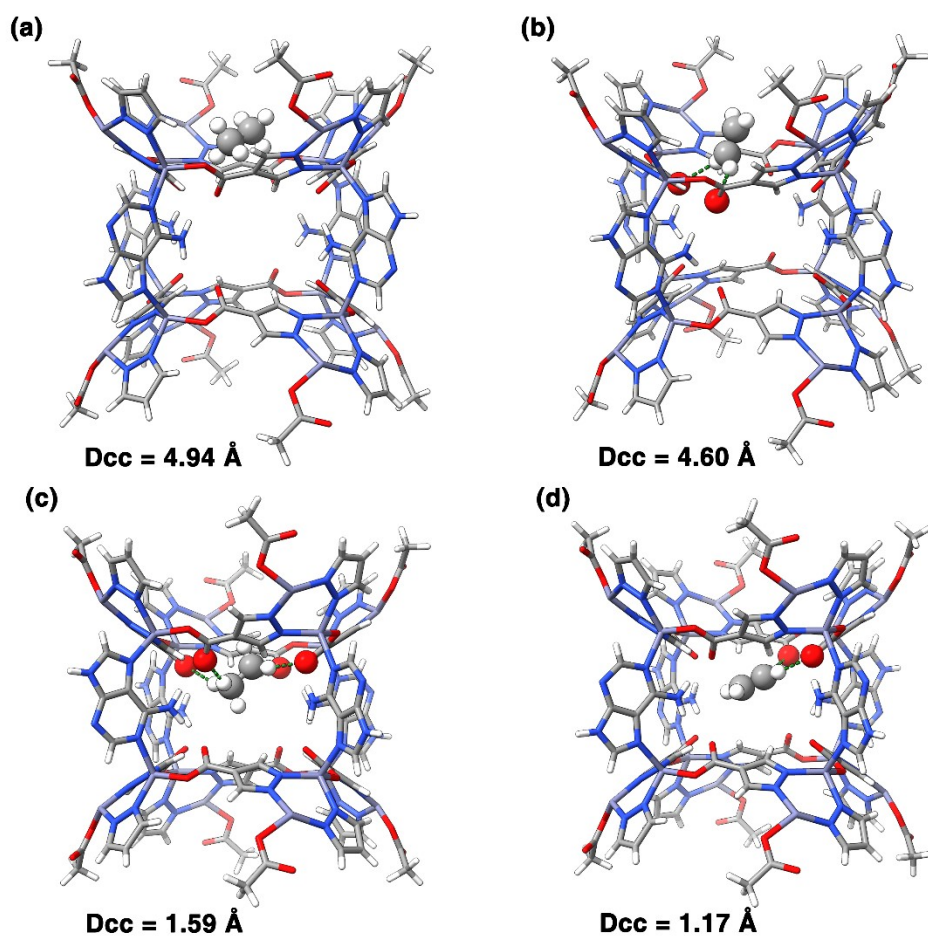

**Figure S11.** The interaction configurations of  $C_2H_6$  and  $C_2H_4$  at **Cage B** edge (a and b) and entering **Cage A** center (c and d), the corresponding  $D_{cc}$  are shown.

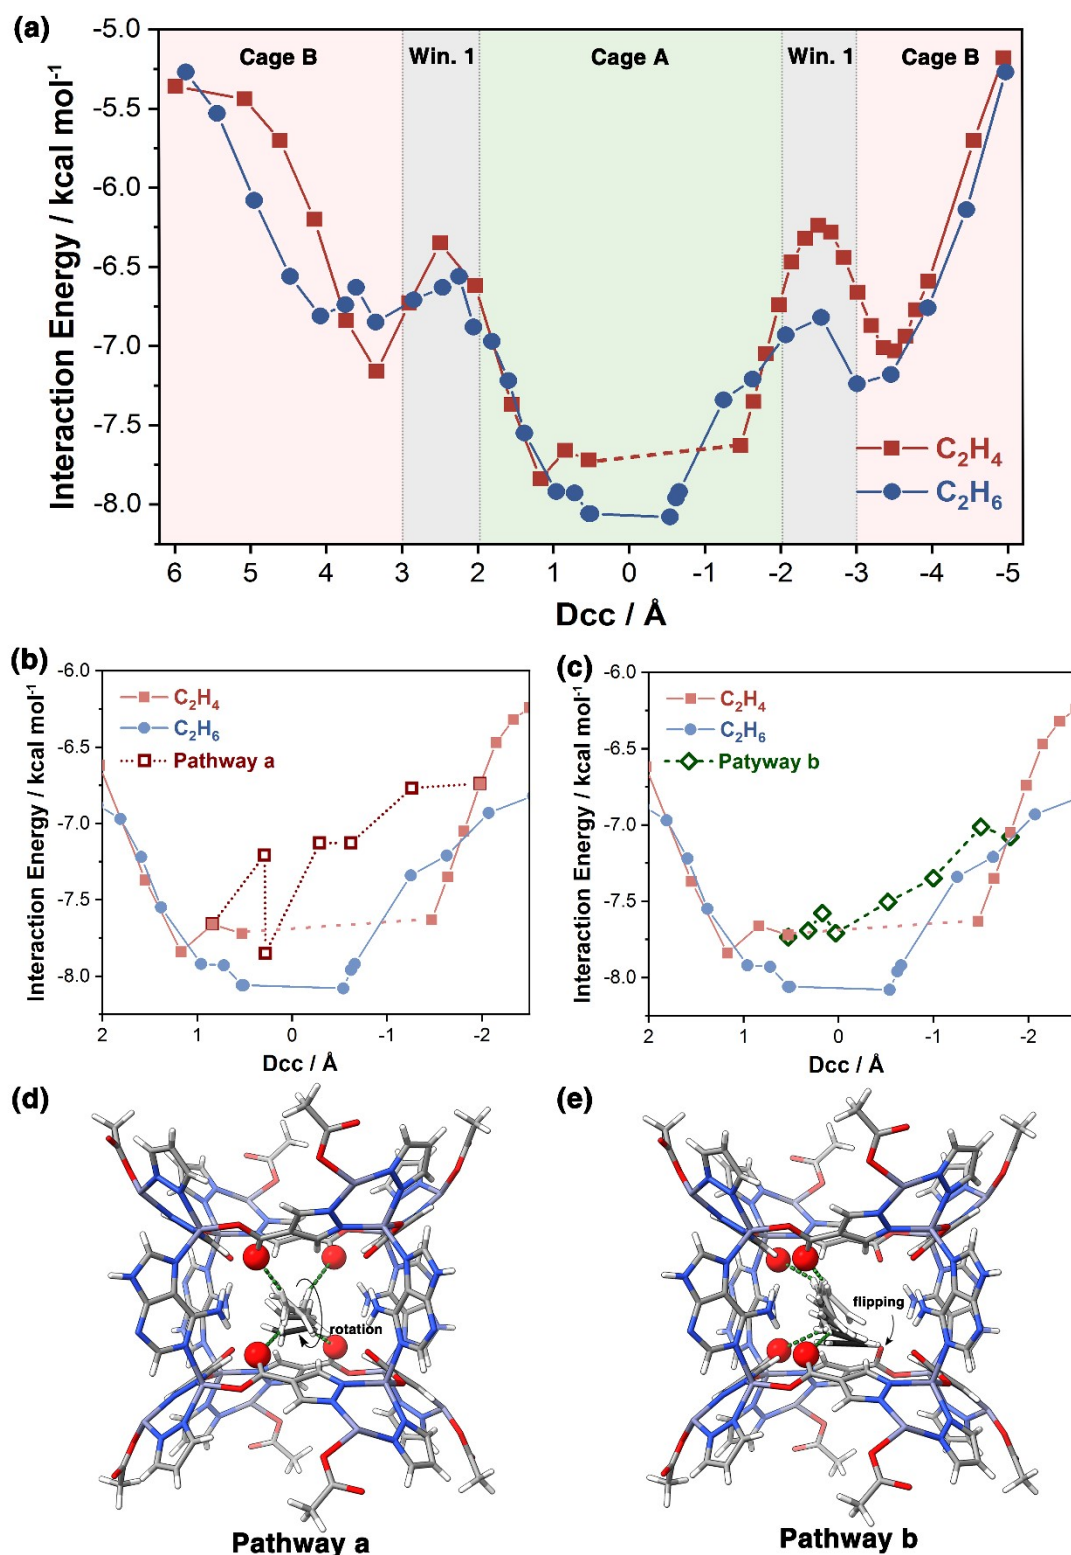

**Figure S12.** The interaction energy profile (a) of actual calculations in which the center of  $C_2H_4$  cannot move continuously on the z-axis with the **Cage A** center as the origin. The proposed  $C_2H_4$  pathways (b and c) based on hydrogen-bonding interaction and the  $C_2H_4$  molecular position change (from light grey to dark grey) of the proposed pathway a (rotation, d) and b (flipping, e). The molecular motion and potential hydrogen bonds are shown as well.

#### Discussion:

During the relaxed scanning calculation, we attempt to make the center of gas molecules move continuously along the z-axis with the **Cage A** center as the origin. The results show that  $C_2H_6$  can move continuously according to the established route in steps of 0.5 Å while  $C_2H_4$  cannot do this in the range between  $D_{cc} = 1$  and  $D_{cc} = -1$ . If put the  $C_2H_4$  molecule in the middle of **Cage A** and optimize the  $C_2H_4@Cage A$  interaction structure, we can obtain two different geometries both with four hydrogen bonds, in which the  $C_2H_4$  center is offset from the **Cage A** center in the x-direction or y-direction. Herein, two possible pathways were proposed which enable  $C_2H_4$  to continue the movement by keeping four hydrogen bonds, and the scanned interaction energy and schematic diagram of two pathways were shown in Figure S9b-e. In pathway a, the  $C_2H_4$  molecule flip 90° with the C-C bond as the axis, which is approximately perpendicular to the plane of **Window 1**. As shown in Figure S9d,  $C_2H_4$  molecule can form four hydrogen bonds with the two opposite oxygen atoms of the upper and lower windows. In pathway b, the  $C_2H_4$  molecule keeps the upper two hydrogen atoms stationary and forms two hydrogen bonds with two adjacent oxygen atoms of the lower **Window 1** by rotating to the side of **Cage A**. The two cis hydrogen atoms interact with the para-oxygen atoms of the upper or lower bottom of **Window 1**, generating a total of four hydrogen bonds. The energy barriers of pathway b are smaller than that of pathway a, indicating pathway b is more reasonable and adopted as part of the interaction energy curve for  $C_2H_4$  in the main text.



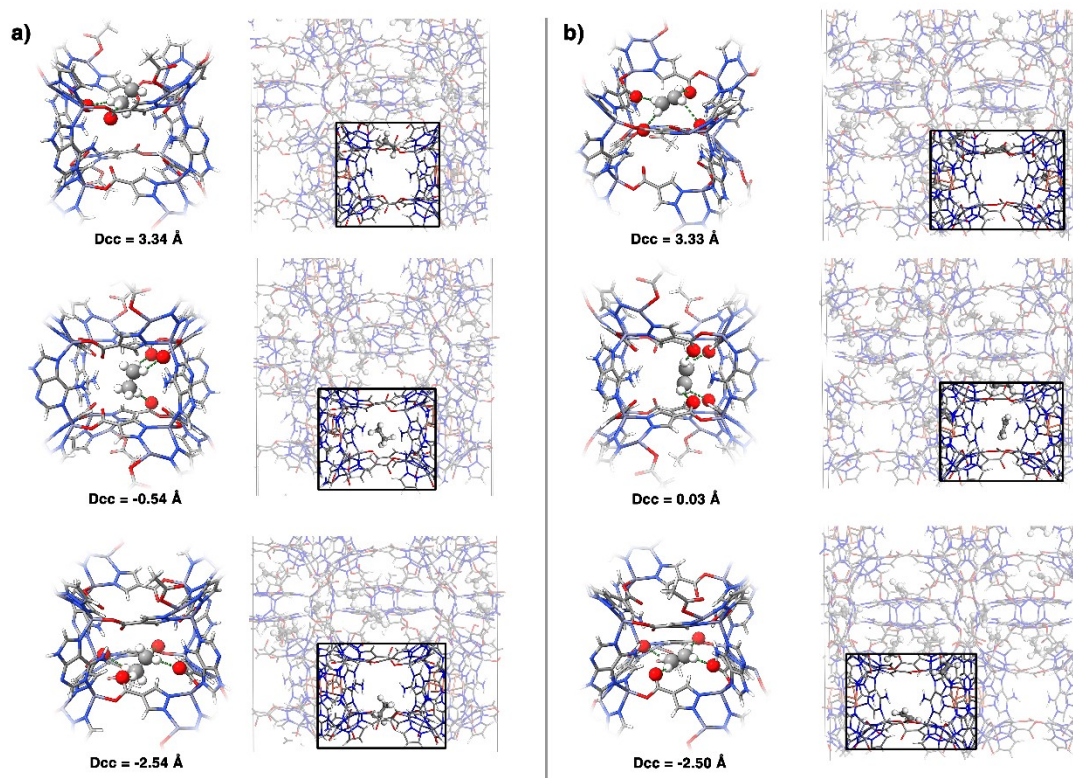

**Figure S13.** The representative interaction configurations of  $C_2H_6@Cage\ A$  (a) and  $C_2H_4@Cage\ A$  (b) from DFT calculations and their similar configurations observed in Channel I from MD simulations.

**Table S2.** DFT calculated NBO (natural bond orbital) atomic charge of C<sub>2</sub>H<sub>6</sub> and C<sub>2</sub>H<sub>4</sub>.

| molecule                      | atom | atomic charge / e |
|-------------------------------|------|-------------------|
| C <sub>2</sub> H <sub>6</sub> | C    | -0.587            |
|                               | H    | 0.196             |
| C <sub>2</sub> H <sub>4</sub> | C    | -0.377            |
|                               | H    | 0.188             |
